# Supplementary material for: Synthesis, structural characterization and conversion of dinuclear iron–sulfur clusters containing the disulfide ligand: [Cp*Fe(μ–η2:η2-bdt)(cis-μ–η1:η1-S2)FeCp*], [Cp*Fe(μ-S(C6H4S2))(cis-μ–η1:η1-S2)FeCp*], and [{Cp*Fe(bdt)}2(trans-μ–η1:η1-S2)]
Source: Royal Society of Chemistry journal article supplement (doi:10.1039/c7dt00450h), 2017-01-01

Supporting Information

**Synthesis, Structural Characterization and Conversion of  
Dinuclear Iron–sulfur Clusters Containing the Disulfide**

**Ligand:**  $[\text{Cp}^*\text{Fe}(\mu\text{-}\eta^2\text{:}\eta^2\text{-bdt})(\text{cis-}\mu\text{-}\eta^1\text{:}\eta^1\text{-S}_2)\text{FeCp}^*]$ ,

$[\text{Cp}^*\text{Fe}(\mu\text{-S}(\text{C}_6\text{H}_4\text{S}_2))(\text{cis-}\mu\text{-}\eta^1\text{:}\eta^1\text{-S}_2)\text{FeCp}^*]$ , and

$[\{\text{Cp}^*\text{Fe}(\text{bdt})\}_2(\text{trans-}\mu\text{-}\eta^1\text{:}\eta^1\text{-S}_2)]$

**Xiaoxiao Ji,<sup>a</sup> Peng Tong,<sup>a</sup> Dawei Yang,<sup>\*a</sup> Baomin Wang,<sup>a</sup> Jinfeng Zhao,<sup>a</sup> Yang  
Li<sup>a</sup> and Jingping Qu<sup>\*,a,b</sup>**

<sup>a</sup>State Key Laboratory of Fine Chemicals, Dalian University of Technology, 2  
Linggong Road, Dalian, 116024, P.R. China.

<sup>b</sup>Key Laboratory for Advanced Materials, East China University of Science and  
Technology, Shanghai, 200237, P.R. China.

## Contents:

|                                                                                                                                                                                                                                                                         |     |
|-------------------------------------------------------------------------------------------------------------------------------------------------------------------------------------------------------------------------------------------------------------------------|-----|
| Experimental Section .....                                                                                                                                                                                                                                              | S3  |
| <i>Table S1.</i> Crystallographic data for <b>2</b> and <b>3</b> .....                                                                                                                                                                                                  | S6  |
| <i>Table S2.</i> Crystallographic data for <b>4</b> .....                                                                                                                                                                                                               | S7  |
| <i>Figure S1.</i> ORTEP diagram of <b>2</b> .....                                                                                                                                                                                                                       | S8  |
| <i>Table S3.</i> Selected bond distances (Å) and bond angles (deg) for <b>2</b> .....                                                                                                                                                                                   | S8  |
| <i>Figure S2.</i> ORTEP diagram of <b>3</b> .....                                                                                                                                                                                                                       | S9  |
| <i>Table S4.</i> Selected bond distances (Å) and bond angles (deg) for <b>3</b> .....                                                                                                                                                                                   | S9  |
| <i>Figure S3.</i> ORTEP diagram of <b>4</b> .....                                                                                                                                                                                                                       | S10 |
| <i>Table S5.</i> Selected bond distances (Å) and bond angles (deg) for <b>4</b> .....                                                                                                                                                                                   | S10 |
| <i>Figure S4.</i> The <sup>1</sup> H NMR spectrum of <b>2</b> in C <sub>6</sub> D <sub>6</sub> .....                                                                                                                                                                    | S11 |
| <i>Figure S5.</i> The <sup>1</sup> H NMR spectrum of <b>3</b> in CDCl <sub>3</sub> .....                                                                                                                                                                                | S11 |
| <i>Figure S6.</i> The <sup>1</sup> H NMR spectrum of <b>4</b> in CD <sub>2</sub> Cl <sub>2</sub> .....                                                                                                                                                                  | S12 |
| <i>Figure S7.</i> The time-dependent <sup>1</sup> H NMR spectra of the conversion from <b>3</b> to <b>4</b> and <b>5</b> in CD <sub>2</sub> Cl <sub>2</sub> at ambient conditions (purple, complex <b>3</b> ; green, complex <b>4</b> ; blue, complex <b>5</b> ). ..... | S12 |
| <i>Figure S8.</i> The EPR spectrum of <b>4</b> .....                                                                                                                                                                                                                    | S13 |
| <i>Figure S9.</i> The IR (film) spectrum of <b>2</b> .....                                                                                                                                                                                                              | S13 |
| <i>Figure S10.</i> The IR (film) spectrum of <b>3</b> .....                                                                                                                                                                                                             | S14 |
| <i>Figure S11.</i> The IR (film) spectrum of <b>4</b> .....                                                                                                                                                                                                             | S14 |

## Experimental Section

### General Procedures

All manipulations were routinely carried out under an argon atmosphere, using standard Schlenk-line techniques. All solvents were dried and distilled over an appropriate drying agent under argon. Complex [Cp\*Fe( $\mu$ - $\eta^2$ : $\eta^4$ -bdt)FeCp\*] (**1**) was prepared according to the literature.<sup>1</sup>

### Spectroscopic measurements

The <sup>1</sup>H NMR spectra were recorded on a Bruker 400 Ultra Shield spectrometer. Infrared spectra were recorded on a NEXVSTM FT-IR spectrometer. Elemental analyses were performed on a Vario EL analyzer. The EPR spectrum was recorded at room temperature on a Bruker EMX-6/1 EPR spectrometer.

### X-ray Crystallography

The data for complexes **2**, **3**, and **4** were afforded on a Bruker SMART APEX CCD diffractometer with graphite monochromated Mo K $\alpha$  radiation ( $\lambda = 0.71073 \text{ \AA}$ ). Empirical absorption corrections were performed using the SADABS program.<sup>2</sup> Structures were solved by direct methods and refined by full-matrix least-squares based on all data using  $F^2$  using Shelx97.<sup>3</sup> Anisotropic thermal displacement coefficients were determined for all non-hydrogen atoms. Hydrogen atoms were placed at idealized positions and refined with fixed isotropic displacement parameters.

### Synthesis of [Cp\*Fe( $\mu$ - $\eta^2$ : $\eta^2$ -bdt)(*cis*- $\mu$ - $\eta^1$ : $\eta^1$ -S<sub>2</sub>)FeCp\*] (**2**)

A solution of **1** (522 mg, 1 mmol) in 25 mL of toluene was treated with S<sub>8</sub> (64 mg, 0.25 mmol) at 0 °C. After 3 h, the resulting solution was evaporated to dryness at reduced pressure. Complex **2** (562 mg, 0.96 mmol) was obtained as a green crystalline powder in 96% yield. The crystals of **2** suitable for X-ray analysis were grown from saturated *n*-hexane solution at -30 °C. <sup>1</sup>H NMR (400 MHz, C<sub>6</sub>D<sub>6</sub>):  $\delta$  6.56 (m, 2H, bdt-*H*); 6.20 (m, 2H, bdt-*H*); 1.08 (s, 30H, Cp\*-CH<sub>3</sub>). IR (film, cm<sup>-1</sup>): 2981, 2902, 1375, 1023, 551. Anal. Calcd for C<sub>26</sub>H<sub>34</sub>Fe<sub>2</sub>S<sub>4</sub>: C, 53.24; H, 5.84. Found: C, 52.62; H,

5.58.

**Synthesis of [Cp\*Fe( $\mu$ -S(C<sub>6</sub>H<sub>4</sub>S<sub>2</sub>))(cis- $\mu$ - $\eta^1$ : $\eta^1$ -S<sub>2</sub>)FeCp\*] (3)**

**Method 1:** A solution of **1** (522 mg, 1 mmol) in 25 mL of THF was treated with S<sub>8</sub> (96 mg, 0.375 mmol) at 0 °C. After 5 h, the resulting solution was evaporated to dryness at reduced pressure. Complex **3** (575 mg, 0.93 mmol) was obtained as a brown crystalline powder in 93% yield.

**Method 2:** A solution of **2** (586 mg, 1 mmol) in 25 mL of THF was treated with S<sub>8</sub> (32 mg, 0.125 mmol) at 0 °C. After 3 h, the resulting solution was evaporated to dryness at reduced pressure. Complex **3** (587 mg, 0.95 mmol) was obtained as a brown crystalline powder in 95% yield. The crystals of **3** suitable for X-ray analysis were obtained by THF solution layered with *n*-hexane at -30 °C. <sup>1</sup>H NMR (400 MHz, CDCl<sub>3</sub>):  $\delta$  7.61 (m, 1H, bdt-*H*); 6.96 (m, 3H, bdt-*H*); 1.20 (s, 15H, Cp\*-CH<sub>3</sub>); 1.16 (s, 15H, Cp\*-CH<sub>3</sub>). IR (film, cm<sup>-1</sup>): 2964, 2905, 1374, 1021, 801, 534. Anal. Calcd for C<sub>26</sub>H<sub>34</sub>Fe<sub>2</sub>S<sub>5</sub>: C, 50.48; H, 5.54. Found: C, 50.46; H, 5.38.

**Synthesis of [(Cp\*(bdt)Fe)<sub>2</sub>(trans- $\mu$ - $\eta^1$ : $\eta^1$ -S<sub>2</sub>)] (4)**

At -78 °C, S<sub>8</sub> (128 mg, 0.5 mmol) was added to a solution of **1** (522 mg, 1 mmol) in 25 mL of CH<sub>2</sub>Cl<sub>2</sub> with vigorous stirring. The reaction mixture was allowed to gradually warm to ambient temperature and continue to stir for 48 h. The resulting brown solution was evaporated to dryness at reduced pressure. The residue was extracted with THF (20 mL) to obtain a brown solution at room temperature. The crystals of **4** suitable for X-ray analysis were obtained by THF solution layered with *n*-hexane at room temperature. Complex **4** (109 mg, 0.15 mmol) was obtained as brown crystals in 15% yield. <sup>1</sup>H NMR (400 MHz, CD<sub>2</sub>Cl<sub>2</sub>):  $\delta$  -1.91 (brs, 4H, bdt-*H*); -3.74 (brs, 30H, Cp\*-CH<sub>3</sub>); -10.24 (brs, 4H, bdt-*H*). IR (film, cm<sup>-1</sup>): 2961, 2907, 1426, 1053, 739. Anal. Calcd for C<sub>32</sub>H<sub>38</sub>Fe<sub>2</sub>S<sub>6</sub>: C, 52.89; H, 5.27. Found: C, 52.33; H, 5.47.

## References

- 1 Y. Li, Y. Li, B. Wang, Y. Luo, D. Yang, P. Tong, J. Zhao, L. Luo, Y. Zhou, S. Chen, F. Cheng and J. Qu, *Nat. Chem.*, 2013, **5**, 320–326.
- 2 G. M. Sheldrick, *SADABS, Program for area detector absorption correction*, Institute for Inorganic Chemistry, University of Göttingen, Germany, 1996.
- 3 (a) G. M. Sheldrick, *SHELX97, Program for refinement of crystal structure*, University of Göttingen, Germany, 1997; (b) G. M. Sheldrick, *SHELXS97, Program for solution of crystal structures*, University of Göttingen, Germany, 1997.

**Table S1.** Crystallographic data for **2** and **3**

| Complex                                                                 | <b>2</b>                                                       | <b>3</b>                                                       |
|-------------------------------------------------------------------------|----------------------------------------------------------------|----------------------------------------------------------------|
| Formula                                                                 | C <sub>26</sub> H <sub>34</sub> Fe <sub>2</sub> S <sub>4</sub> | C <sub>26</sub> H <sub>34</sub> Fe <sub>2</sub> S <sub>5</sub> |
| Formula weight                                                          | 586.47                                                         | 618.53                                                         |
| Crystal dimensions (mm <sup>3</sup> )                                   | 0.33 × 0.31 × 0.29                                             | 0.33 × 0.31 × 0.29                                             |
| Crystal system                                                          | Monoclinic                                                     | Orthorhombic                                                   |
| Space group                                                             | C2/c                                                           | Pnma                                                           |
| a (Å)                                                                   | 27.672(16)                                                     | 15.281(5)                                                      |
| b (Å)                                                                   | 13.486(8)                                                      | 21.433(7)                                                      |
| c (Å)                                                                   | 17.289(10)                                                     | 8.290(3)                                                       |
| α (°)                                                                   | 90.00                                                          | 90.00                                                          |
| β (°)                                                                   | 126.191(8)                                                     | 90.00                                                          |
| γ (°)                                                                   | 90.00                                                          | 90.00                                                          |
| Volume (Å <sup>3</sup> )                                                | 5207(5)                                                        | 2715.1(16)                                                     |
| Z                                                                       | 8                                                              | 4                                                              |
| T (K)                                                                   | 296(2)                                                         | 296(2)                                                         |
| D <sub>calcd</sub> (g cm <sup>-3</sup> )                                | 1.496                                                          | 1.513                                                          |
| μ (mm <sup>-1</sup> )                                                   | 1.448                                                          | 1.467                                                          |
| F (000)                                                                 | 2448                                                           | 1288                                                           |
| No. of rflns. collected                                                 | 14112                                                          | 17040                                                          |
| No. of indep. rflns. /R <sub>int</sub>                                  | 4944 / 0.1145                                                  | 3184 / 0.0923                                                  |
| No. of obsd. rflns. [I <sub>0</sub> > 2σ(I <sub>0</sub> )]              | 2687                                                           | 1886                                                           |
| Data / restraints / parameters                                          | 4944 / 0 / 299                                                 | 3184 / 0 / 174                                                 |
| R <sub>1</sub> / wR <sub>2</sub> [I <sub>0</sub> > 2σ(I <sub>0</sub> )] | 0.0736 / 0.1617                                                | 0.0617 / 0.1130                                                |
| R <sub>1</sub> / wR <sub>2</sub> (all data)                             | 0.1402 / 0.1940                                                | 0.1138 / 0.1280                                                |
| GOF (on F <sup>2</sup> )                                                | 1.060                                                          | 1.225                                                          |
| Largest diff. peak and hole (e Å <sup>-3</sup> )                        | 1.379 / -1.011                                                 | 0.475 / -0.480                                                 |

**Table S2.** Crystallographic data for **4**

| Complex                                                                 | <b>4</b>                                                       |
|-------------------------------------------------------------------------|----------------------------------------------------------------|
| Formula                                                                 | C <sub>32</sub> H <sub>38</sub> Fe <sub>2</sub> S <sub>6</sub> |
| Formula weight                                                          | 726.68                                                         |
| Crystal dimensions (mm <sup>3</sup> )                                   | 0.33 × 0.31 × 0.24                                             |
| Crystal system                                                          | Monoclinic                                                     |
| Space group                                                             | P2(1)/c                                                        |
| a (Å)                                                                   | 11.0709(3)                                                     |
| b (Å)                                                                   | 18.7405(5)                                                     |
| c (Å)                                                                   | 8.3665(2)                                                      |
| α (°)                                                                   | 90.00                                                          |
| β (°)                                                                   | 106.6040(10)                                                   |
| γ (°)                                                                   | 90.00                                                          |
| Volume (Å <sup>3</sup> )                                                | 1663.45(7)                                                     |
| Z                                                                       | 2                                                              |
| T (K)                                                                   | 296(2)                                                         |
| D <sub>calcd</sub> (g cm <sup>-3</sup> )                                | 1.451                                                          |
| μ (mm <sup>-1</sup> )                                                   | 1.270                                                          |
| F (000)                                                                 | 756                                                            |
| No. of rflns. collected                                                 | 5880                                                           |
| No. of indep. rflns. /R <sub>int</sub>                                  | 2867 / 0.0185                                                  |
| No. of obsd. rflns. [I <sub>0</sub> > 2σ(I <sub>0</sub> )]              | 2469                                                           |
| Data / restraints / parameters                                          | 2867 / 0 / 181                                                 |
| R <sub>1</sub> / wR <sub>2</sub> [I <sub>0</sub> > 2σ(I <sub>0</sub> )] | 0.0339 / 0.0950                                                |
| R <sub>1</sub> / wR <sub>2</sub> (all data)                             | 0.0407 / 0.0992                                                |
| GOF (on F <sup>2</sup> )                                                | 1.085                                                          |
| Largest diff. peak and hole (e Å <sup>-3</sup> )                        | 0.466 / -0.282                                                 |

**Figure S1.** ORTEP diagram of **2**

Hydrogen atoms are omitted for clarity (thermal ellipsoids shown at 50% probability).

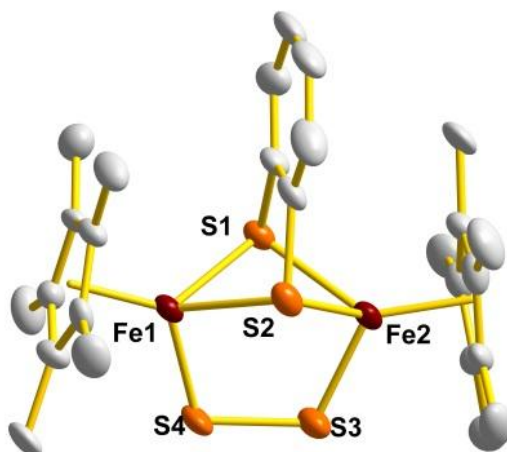

**Table S3.** Selected bond distances (Å) and bond angles (deg) for **2**

| Distances (Å)        |            |            |            |
|----------------------|------------|------------|------------|
| Fe1··Fe2             | 3.395(3)   | Fe1–S1     | 2.348(2)   |
| Fe1–S2               | 2.366(2)   | Fe1–S4     | 2.118(2)   |
| Fe2–S1               | 2.351(2)   | Fe2–S2     | 2.359(2)   |
| Fe2–S3               | 2.120(3)   | S3–S4      | 2.005(3)   |
| Angles (deg)         |            |            |            |
| S1–Fe2–S3            | 95.47(9)   | Fe1–S2–Fe2 | 91.86(8)   |
| S2–Fe2–S3            | 94.53(9)   | Fe1–S1–Fe2 | 92.50(9)   |
| S1–S4–Fe3            | 109.23(13) | Fe2–S3–S4  | 109.02(11) |
| Torsion angles (deg) |            |            |            |
| S3–S4Fe1–S1          | 36.41(16)  | Cp*1–Cp*2  | 19.84(34)  |
| S3–S4Fe1–S2          | 38.18(16)  |            |            |



**Figure S2.** ORTEP diagram of **3**

Hydrogen atoms are omitted for clarity (thermal ellipsoids shown at 50% probability).

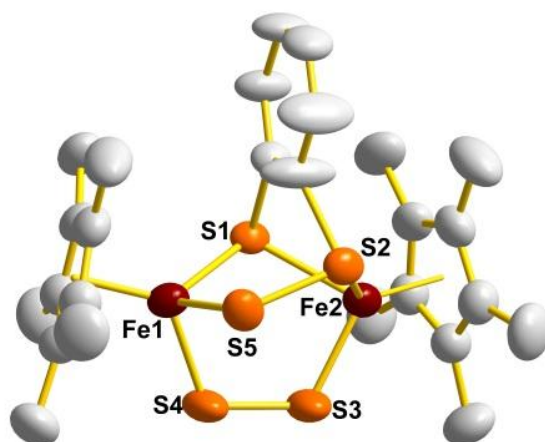

**Table S4.** Selected bond distances (Å) and bond angles (deg) for **3**

| Distances (Å)        |            |             |           |
|----------------------|------------|-------------|-----------|
| Fe1··Fe2             | 3.697(2)   | Fe1–S1      | 2.294(2)  |
| Fe1–S5               | 2.146(3)   | Fe1–S4      | 2.117(2)  |
| S2–S5                | 2.061(4)   | S3–S4       | 1.973(2)  |
| Angles (deg)         |            |             |           |
| Fe1–S4–S3            | 114.02(78) | S2–Fe1–S5   | 21.96(8)  |
| S2–Fe1–S4            | 101.58(8)  | S4–Fe1–S5   | 89.33(10) |
| S1–Fe1–S5            | 96.40(9)   | S1–Fe1–S4   | 92.27(6)  |
| Fe1–S5–S2            | 105.23(14) |             |           |
| Torsion angles (deg) |            |             |           |
| S3–S4Fe1–S1          | 25.80(9)   | S4–S3Fe2–S2 | 52.24(11) |
| S3–S4Fe1–S5          | 70.59(12)  | Cp*1–Cp*2   | 31.58(18) |

**Figure S3.** ORTEP diagram of **4**

Hydrogen atoms are omitted for clarity (thermal ellipsoids shown at 50% probability).

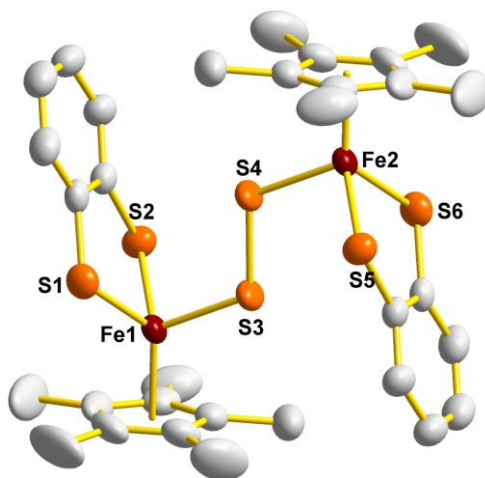

**Table S5.** Selected bond distances (Å) and bond angles (deg) for **4**

| Distances (Å)        |           |           |          |
|----------------------|-----------|-----------|----------|
| Fe1··Fe2             | 5.404(1)  | Fe1–S1    | 2.194(1) |
| Fe1–S2               | 2.191(2)  | Fe1–S3    | 2.177(2) |
| S3–S4                | 1.978(1)  |           |          |
| Angles (deg)         |           |           |          |
| Fe1–S3–S4            | 111.60(5) | S2–Fe1–S3 | 97.46(3) |
| S1–Fe1–S3            | 99.05(3)  | S1–Fe1–S2 | 88.98(3) |
| Torsion angles (deg) |           |           |          |
| S1–S2Fe1–S3          | 98.96(4)  | Cp*1–Cp*2 | 0.00(20) |

**Figure S4.** The  $^1\text{H}$  NMR spectrum of **2** in  $\text{C}_6\text{D}_6$

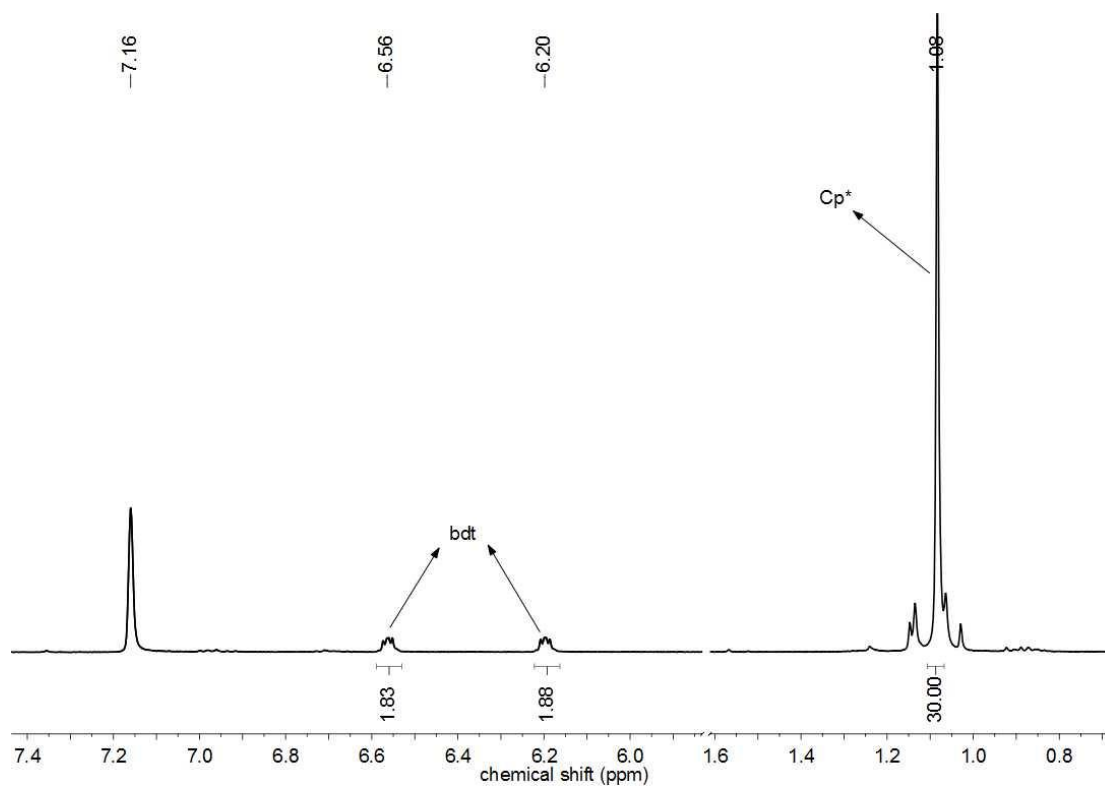

**Figure S5.** The  $^1\text{H}$  NMR spectrum of **3** in  $\text{CDCl}_3$

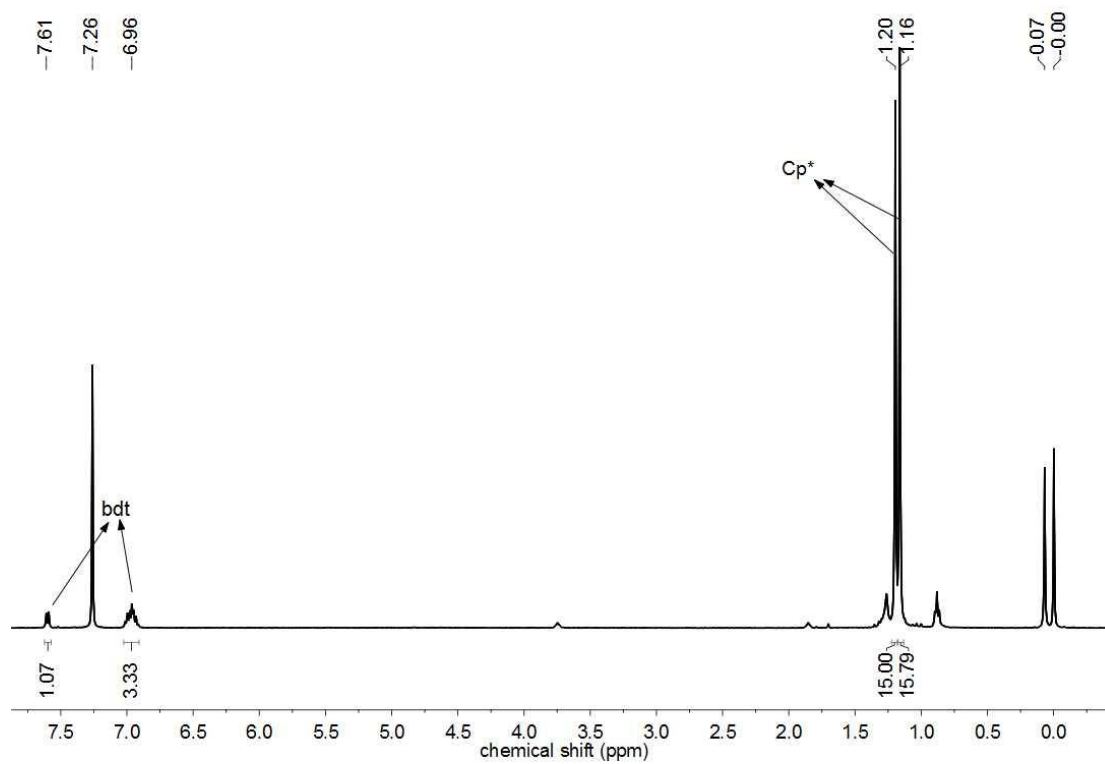

**Figure S6.** The  $^1\text{H}$  NMR spectrum of **4** in  $\text{CD}_2\text{Cl}_2$

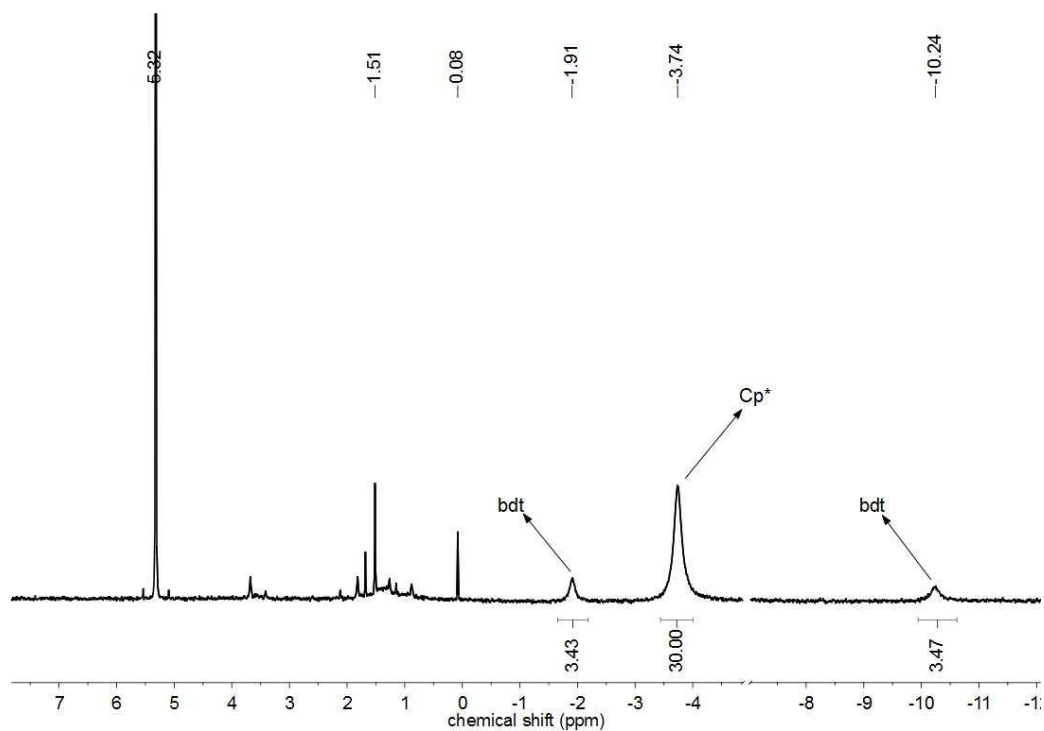

**Figure S7.** The time-dependent  $^1\text{H}$  NMR spectra of the conversion from **3** to **4** and **5** in  $\text{CD}_2\text{Cl}_2$  at ambient conditions (purple, complex **3**; green, complex **4**; blue, complex **5**).

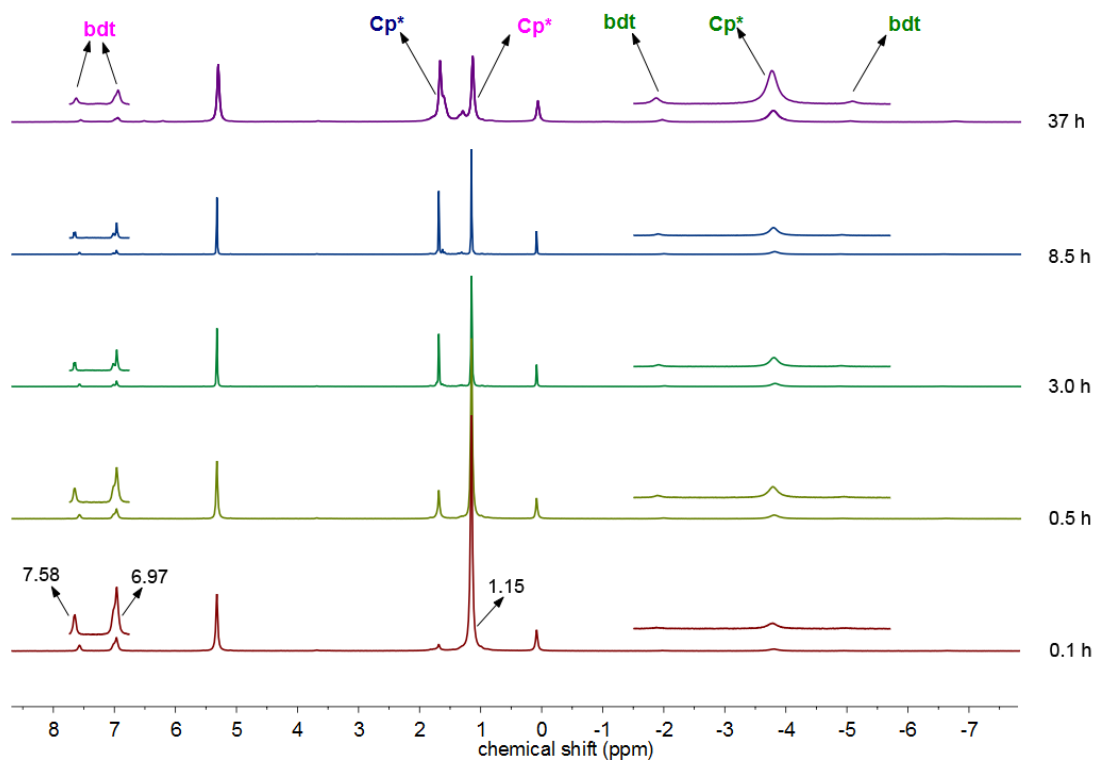

**Figure S8.** The EPR spectrum of **4**

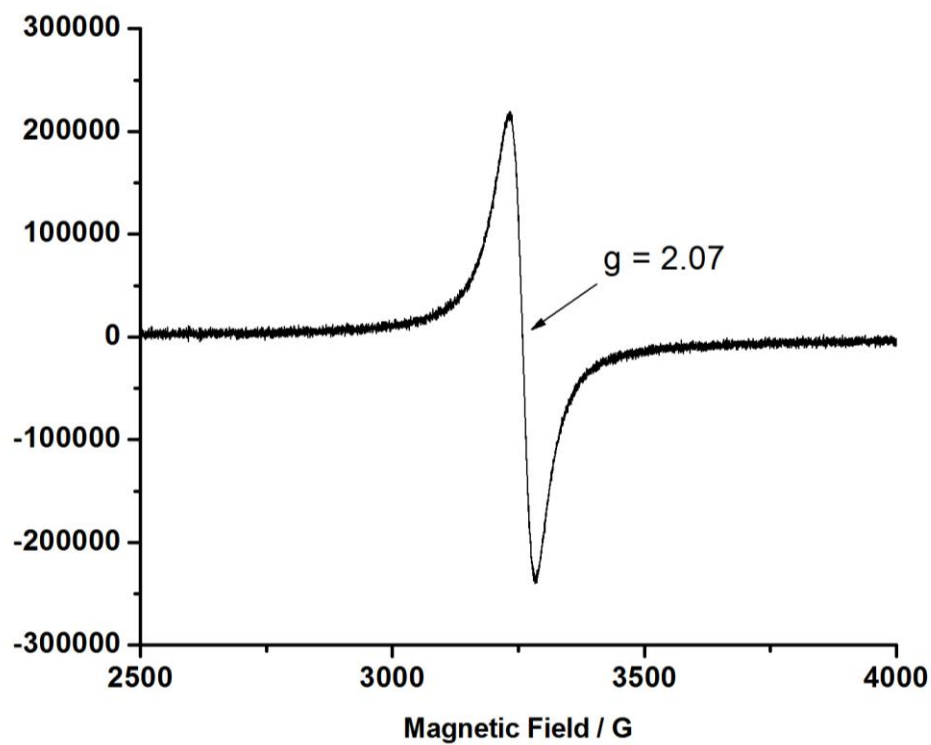

**Figure S9.** The IR (film) spectrum of **2**

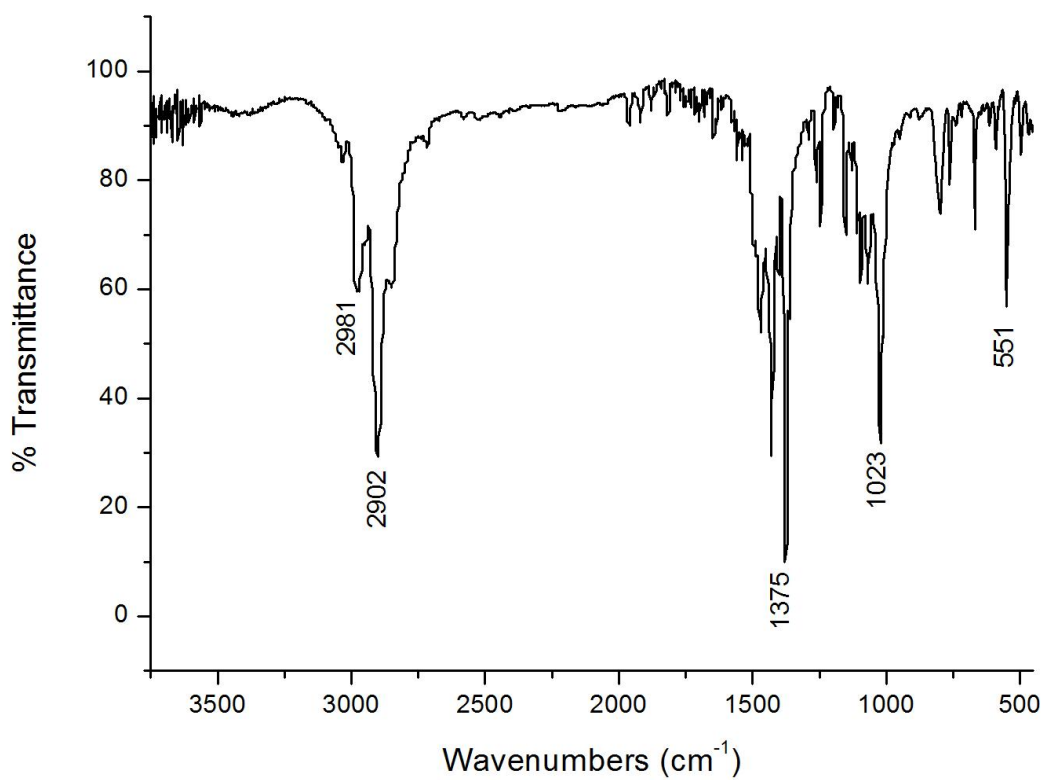

**Figure S10.** The IR (film) spectrum of **3**

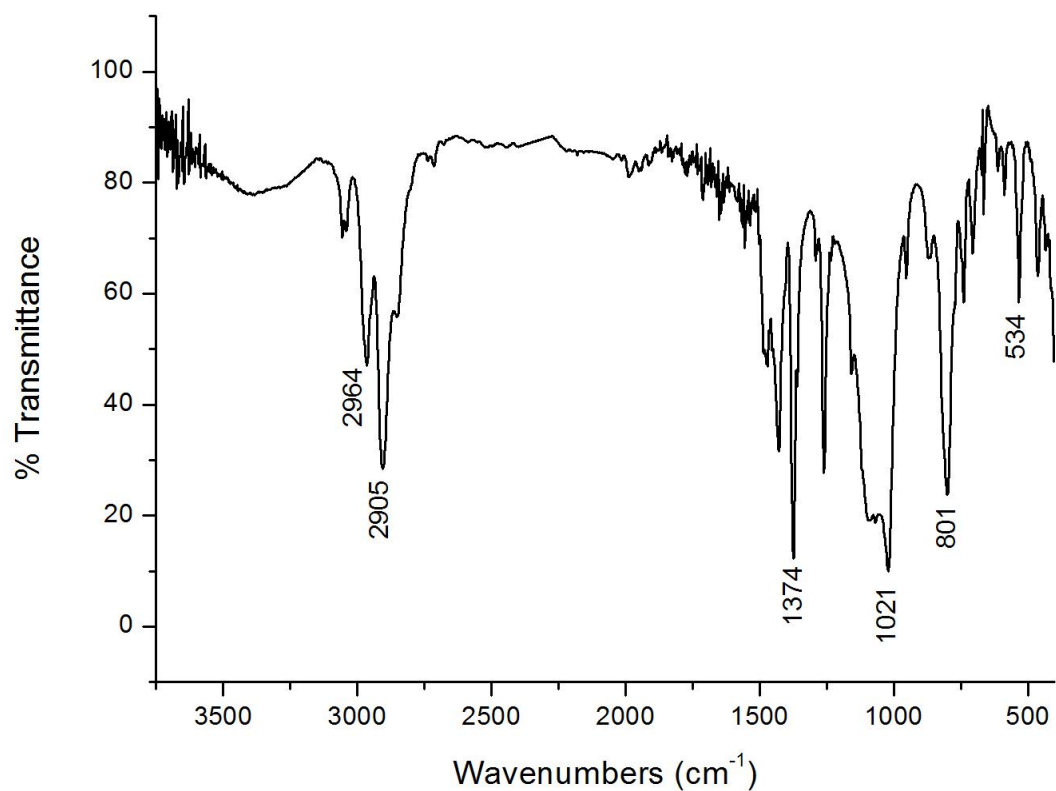

**Figure S11.** The IR (film) spectrum of **4**

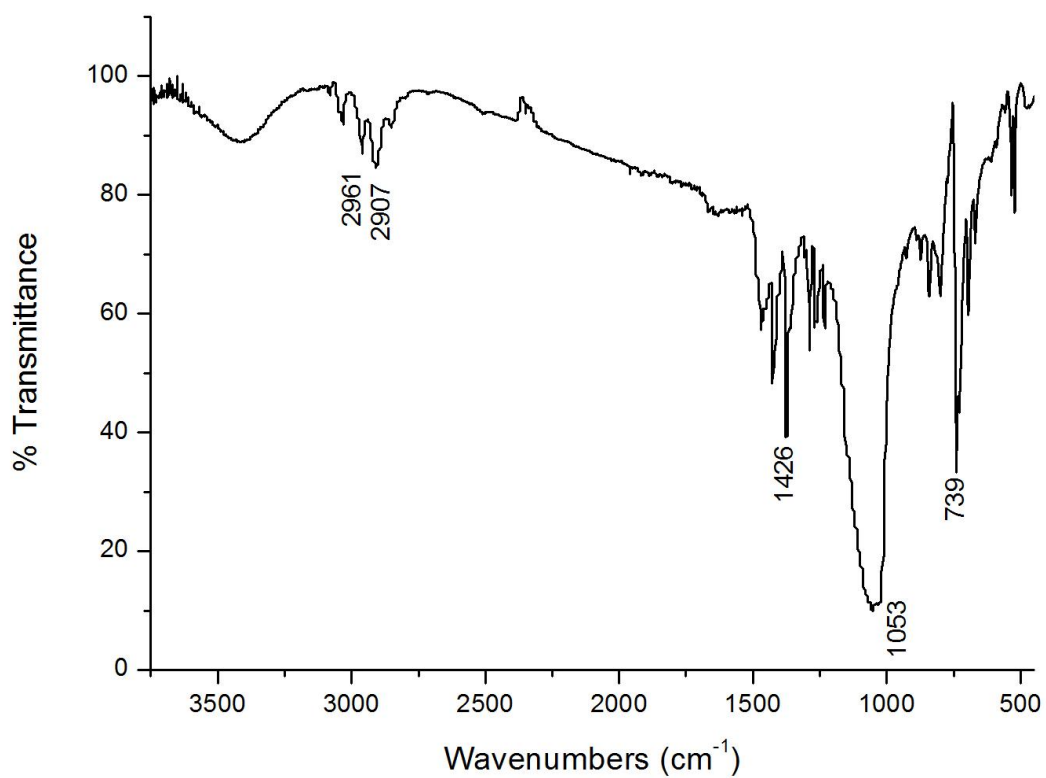

Supplement: c7dt00450h1.pdf [file c7dt00450h1.pdf]
